# Supplementary material for: Structural, Mechanical, and Tribological Properties of Oriented Ultra-High Molecular Weight Polyethylene/Graphene Nanoplates/Polyaniline Films
Source: MDPI journal article supplement (doi:10.3390/polym15030758), 2023-02-02
Supplement: s1 [file s1]

Supplementary

# Structural, Mechanical, and Tribological Properties of Oriented Ultra-High Molecular Weight Polyethylene/Graphene Nanoplates/Polyaniline Films

Tarek Dayyoub <sup>1,2,\*</sup>, Aleksey Maksimkin <sup>2,\*</sup>, Leonid K. Olifirov <sup>1</sup>, Dilus Chukov <sup>1</sup>, Evgeniy Kolesnikov <sup>1</sup>, Sergey D. Kaloshkin <sup>1</sup> and Dmitry V. Telyshev <sup>2,3</sup>

<sup>1</sup> Department of Physical Chemistry, National University of Science and Technology “MISIS”, 119049 Moscow, Russia; leonidolifirov@gmail.com (L.K.O.); dil\_chukov@mail.ru (D.C.); kea.misis@gmail.com (E.K.); kaloshkin@isis.ru (S.D.K.)

<sup>2</sup> Institute for Bionic Technologies and Engineering, I.M. Sechenov First Moscow State Medical University (Sechenov University), Bolshaya Pirogovskaya Street 2-4, 119991 Moscow, Russia; telyshev@bms.zone

<sup>3</sup> Institute of Biomedical Systems, National Research University of Electronic Technology, Zelenograd, 124498 Moscow, Russia

\* Correspondence: tarekzd@windowslive.com (T.D.); aleksey\_maksimkin@mail.ru (A.M.)

**Citation:** Dayyoub, T.; Maksimkin, A.; Olifirov, L.K.; Chukov, D.; Kolesnikov, E.; Kaloshkin, S.D.; Telyshev, D.V. Structure, Mechanical and Tribological Properties of Oriented Ultra-High Molecular Weight Polyethylene/Graphene Nanoplates/Polyaniline Films. *Polymers* **2023**, *15*, x. <https://doi.org/10.3390/xxxxx>

Academic Editor(s): Amitesh Maiti

Received: date

Revised: date

Accepted: date

Published: date

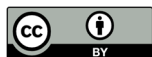

**Copyright:** © 2023 by the authors. Submitted for possible open access publication under the terms and conditions of the Creative Commons Attribution (CC BY) license (<https://creativecommons.org/licenses/by/4.0/>).

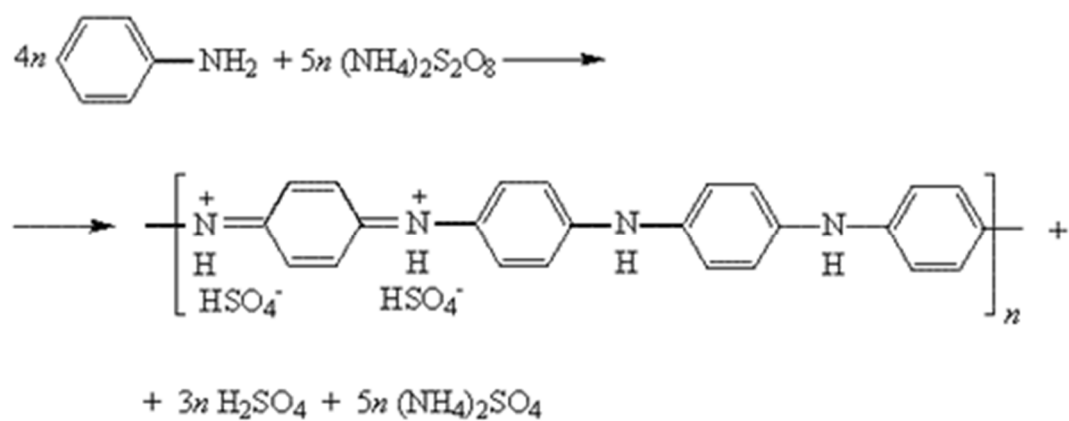

**Figure S1.** The scheme of oxidative polymerization of aniline [20].

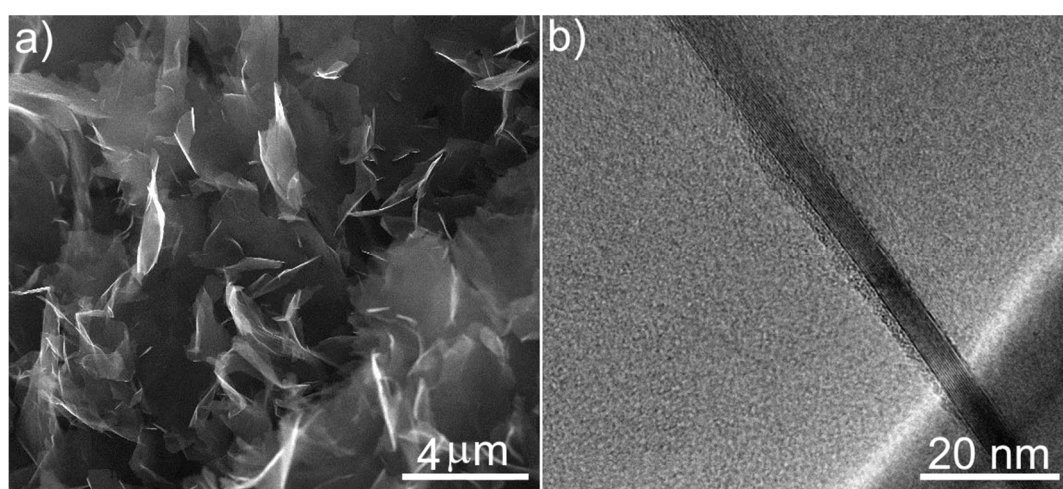

**Figure S2.** (a) SEM and (b) TEM micrographs of GNP microstructure [20].

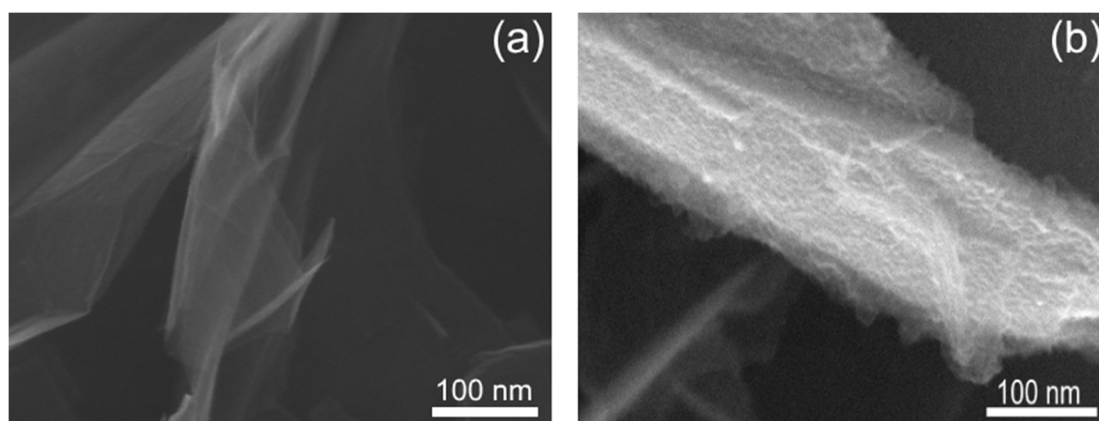

**Figure S3.** SEM micrograph of the (a) unmodified GNP and (b) modified GNP by PANI [20].

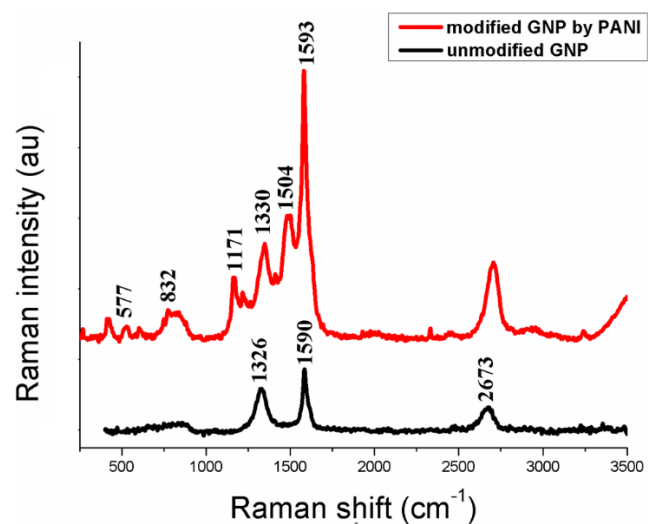

**Figure S4.** Raman spectra of (a) unmodified GNP and (b) modified GNP by PANI [20].

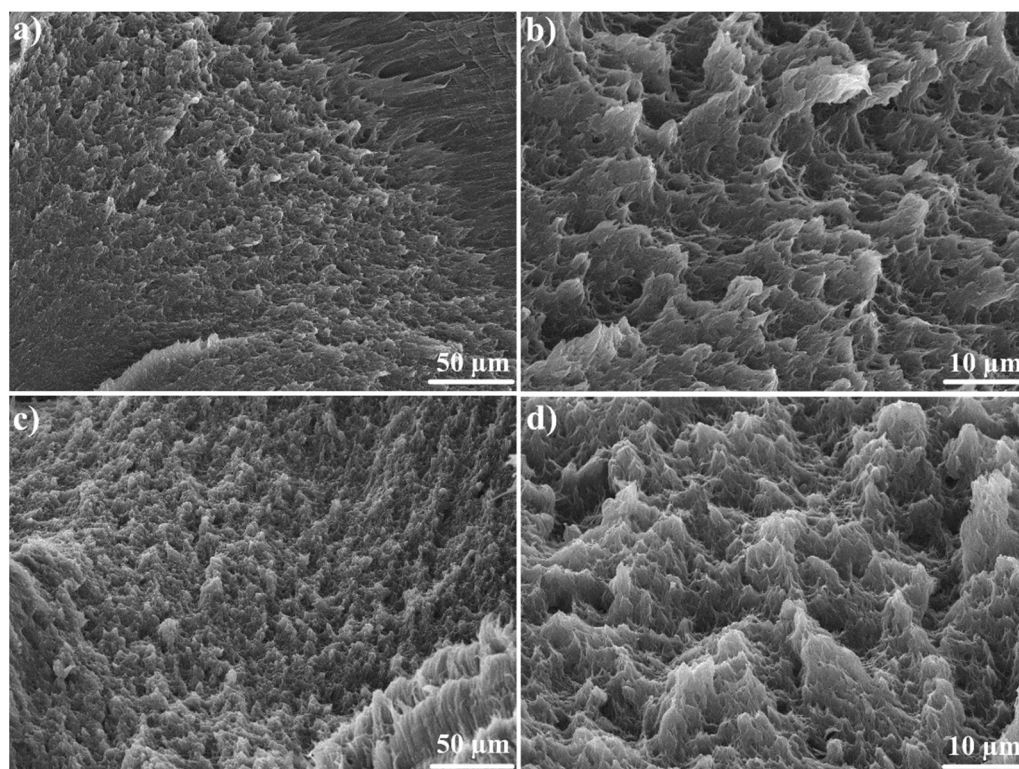

**Figure S5.** SEM micrographs showing typical supra-molecular structure of (a, b) UHMWPE /1.0 wt. % PE-wax/ 0.01 wt. % GNP/PANI, and (c, d) UHMWPE /1.0wt. % PE-wax/ 2.0 wt.% GNP/PANI xerogels.

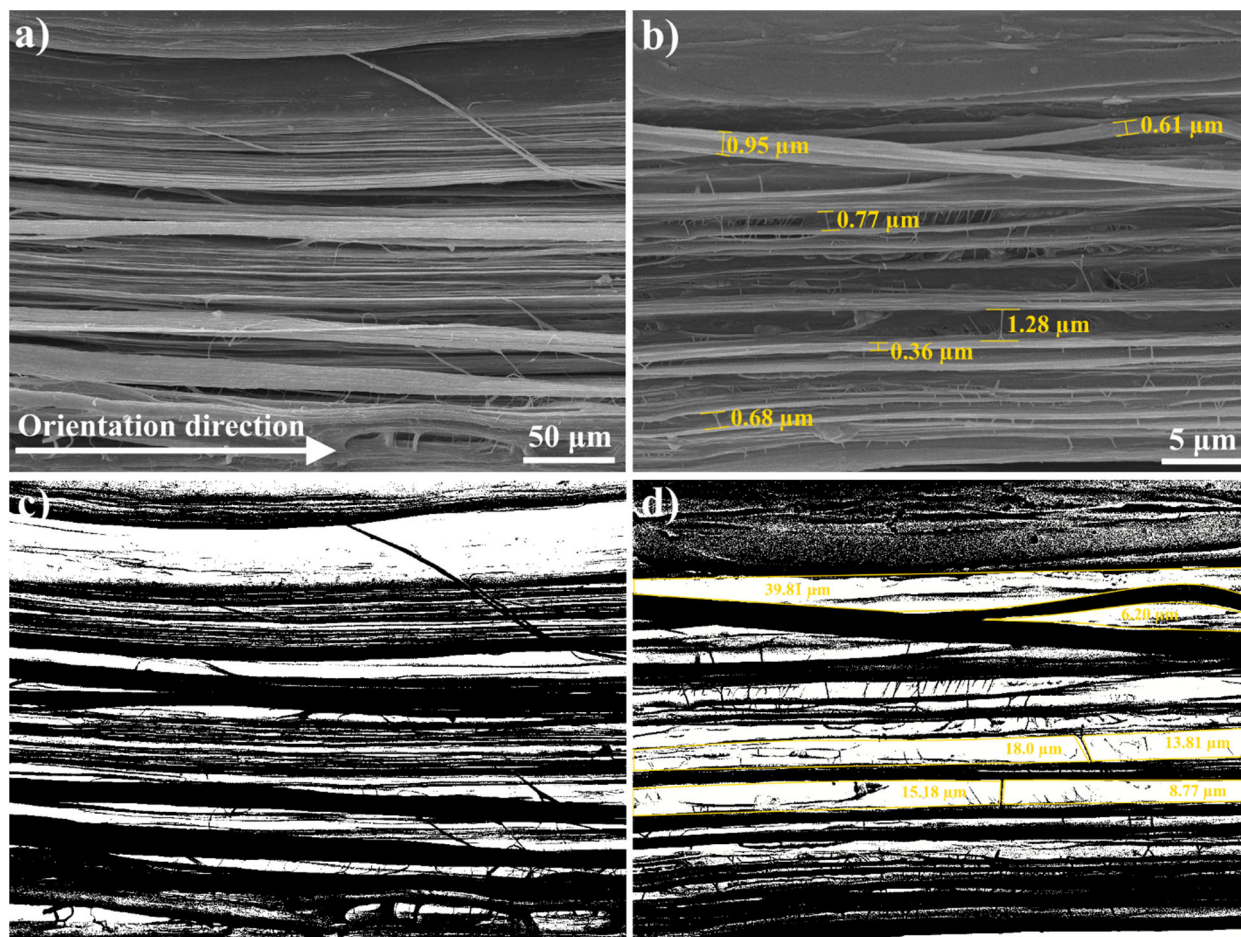

**Cavitation area in percentage =  $38 \pm 2$  %**

**Figure S6.** SEM micrographs of fibrillar structure for virgin UHMWPE films obtained by first thermal orientation regime (a, b), (c, d) modified SEM images using the image J program. The average pore size is  $1.2 \pm 0.2$   $\mu\text{m}$ .



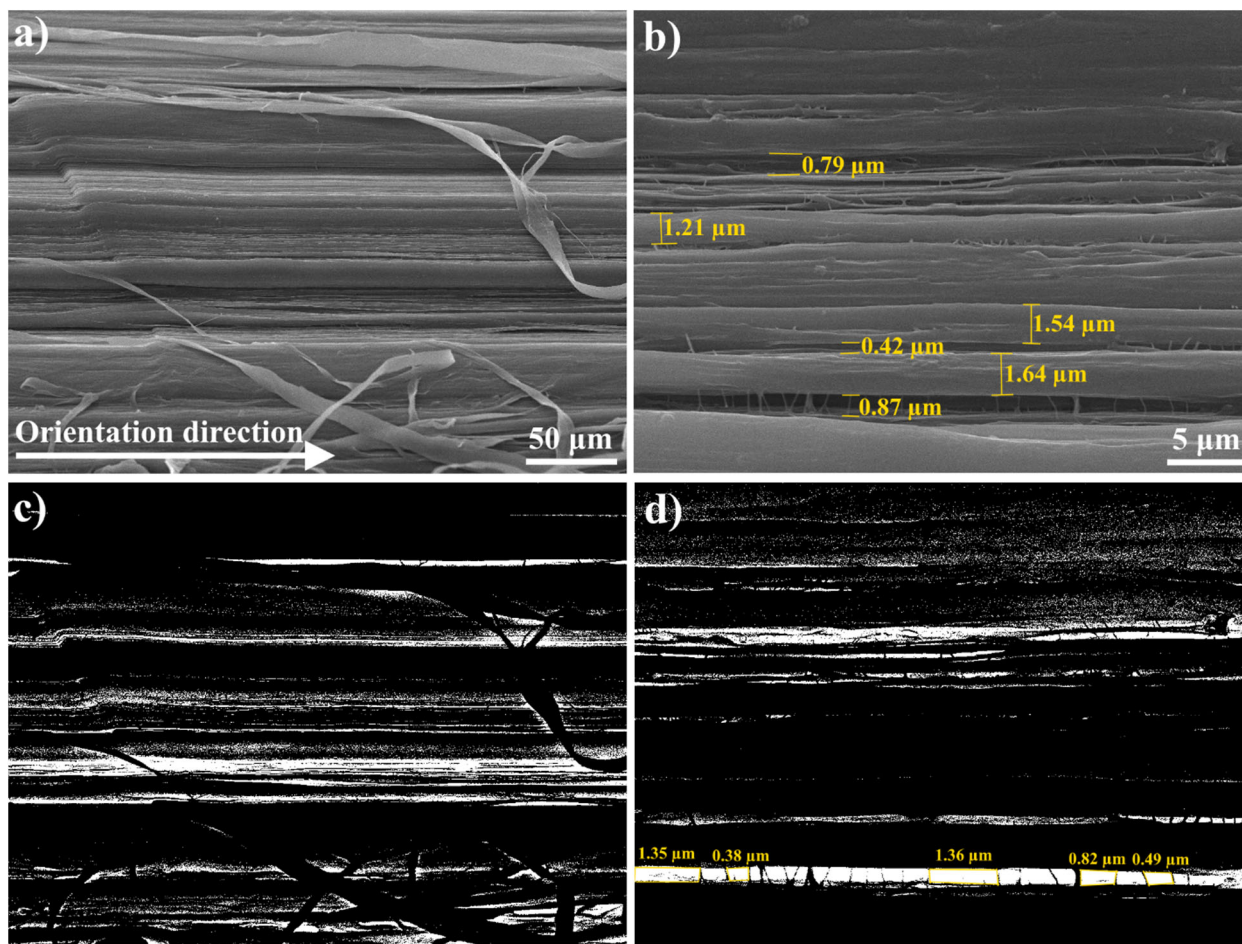

**Cavitation area in percentage =  $10 \pm 1$  %**

**Figure S7.** SEM micrographs of fibrillar structure for UHMWPE/1.0 wt. % PE-wax films obtained by first thermal orientation regime (a, b), (c, d) modified SEM images using the image J program. The average pore size is  $0.8 \pm 0.2$  μm.

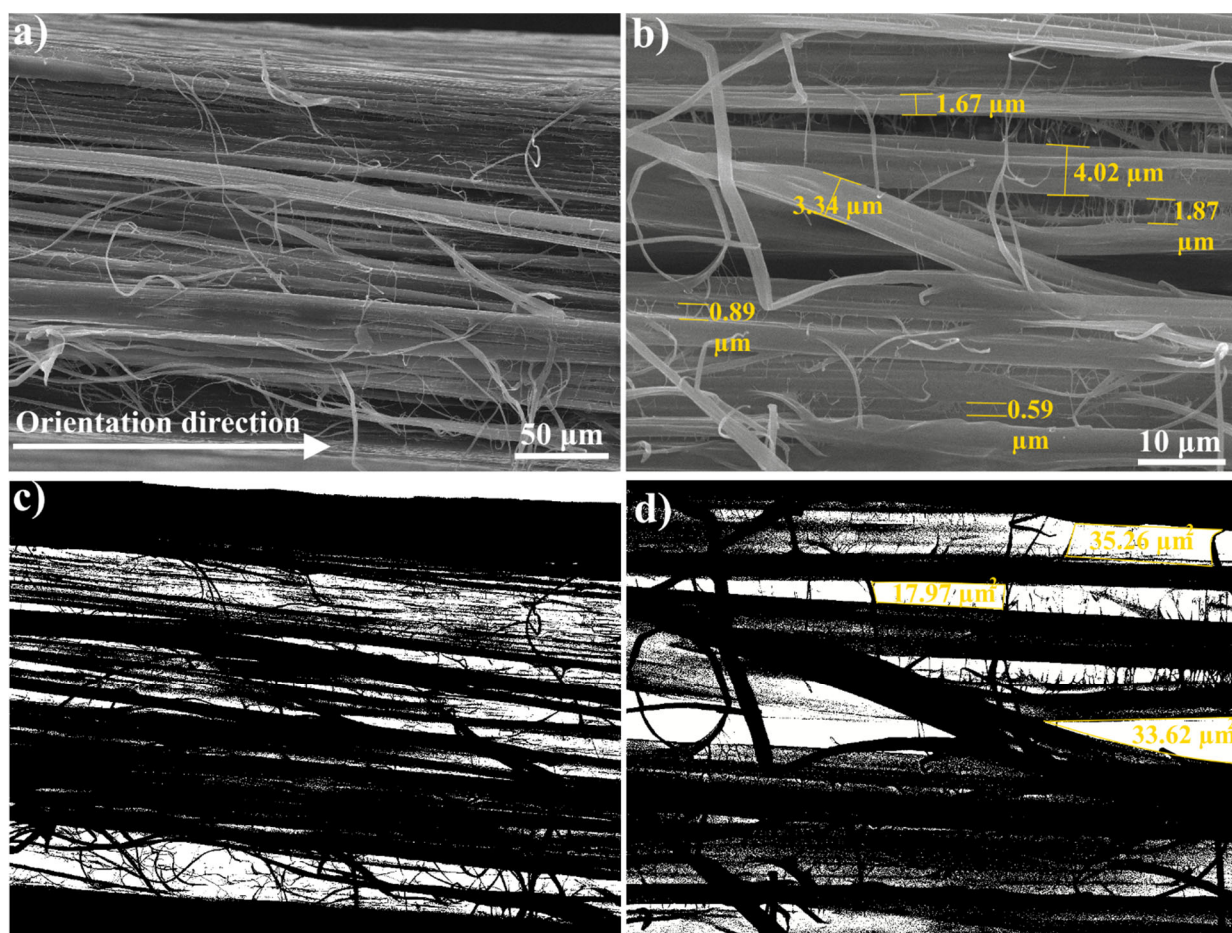

**Cavitation area in percentage =  $22 \pm 2$  %**

**Figure S8.** SEM micrographs of fibrillar structure for UHMWPE /1.0 wt. % PE-wax/ 0.01 wt. % GNP/PAN films obtained by first thermal orientation regime (a, b), (c, d) modified SEM images using the image J program. The average pore size is  $3.4 \pm 0.5$   $\mu\text{m}$ .

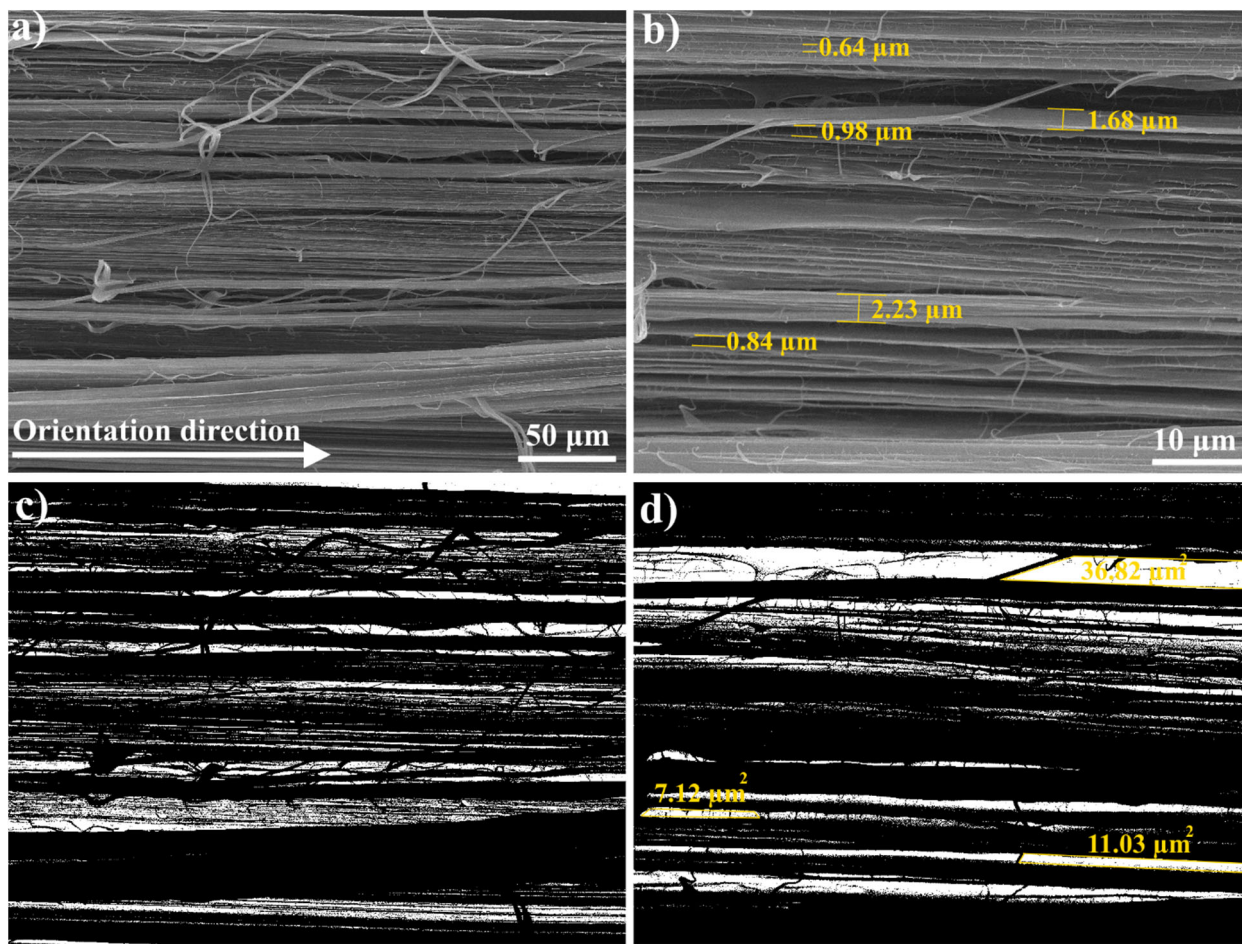

**Cavitation area in percentage =  $17 \pm 1$  %**

**Figure S9.** SEM micrographs of fibrillar structure for UHMWPE /1.0 wt. % PE-wax/ 0.01 wt. % GNP/PAN films obtained by second thermal orientation regime (a, b), (c, d) modified SEM images using the image J program. The average pore size is  $1.8 \pm 0.2$  μm.



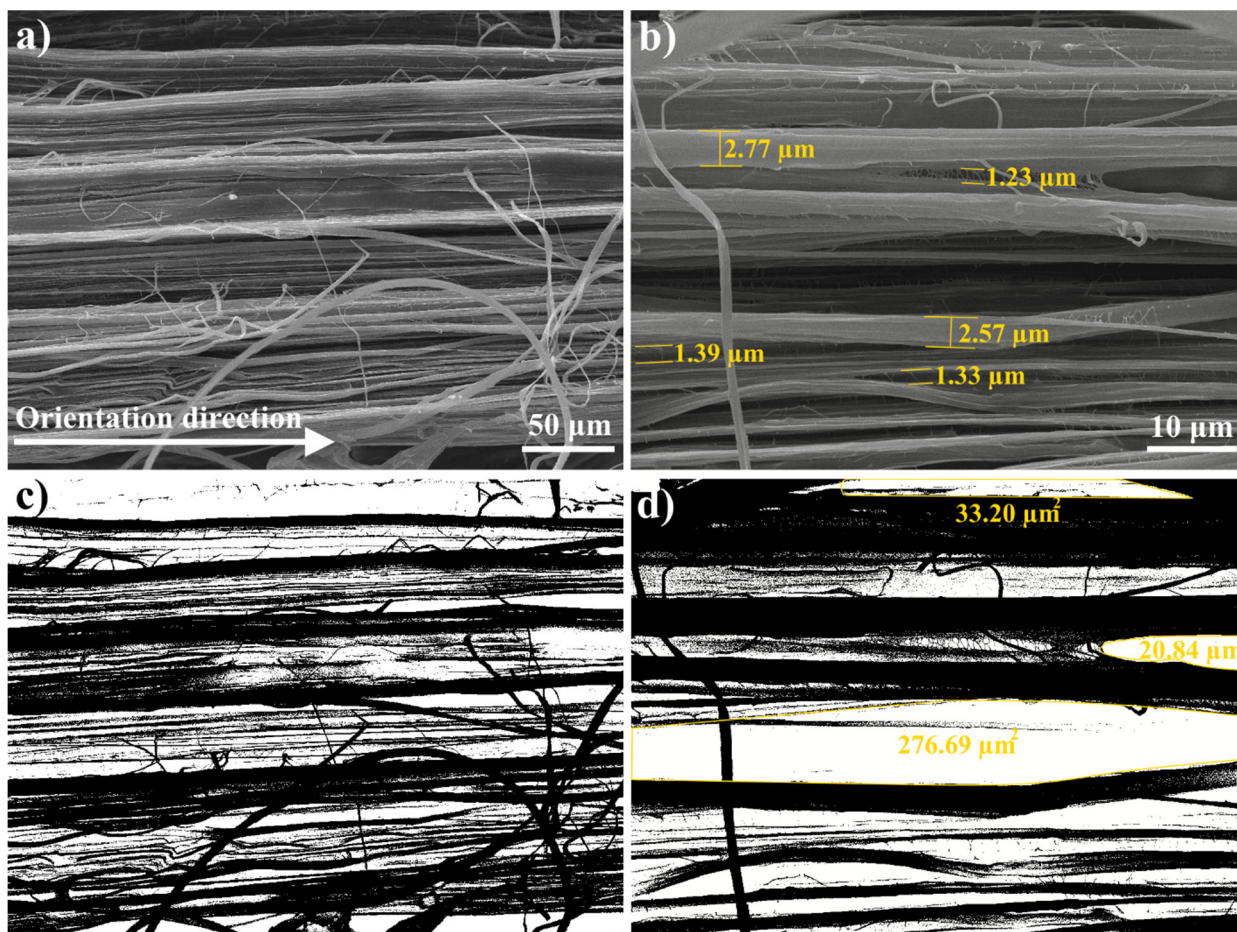

**Cavitation area in percentage =  $42 \pm 1$  %**

**Figure S10.** SEM micrographs of fibrillar structure for UHMWPE /1.0 wt. % PE-wax/ 2.0 wt. % GNP/PANI films obtained by first thermal orientation regime (a, b), (c, d) modified SEM images using the image J program. The average pore size is  $3.7 \pm 0.4$  μm.



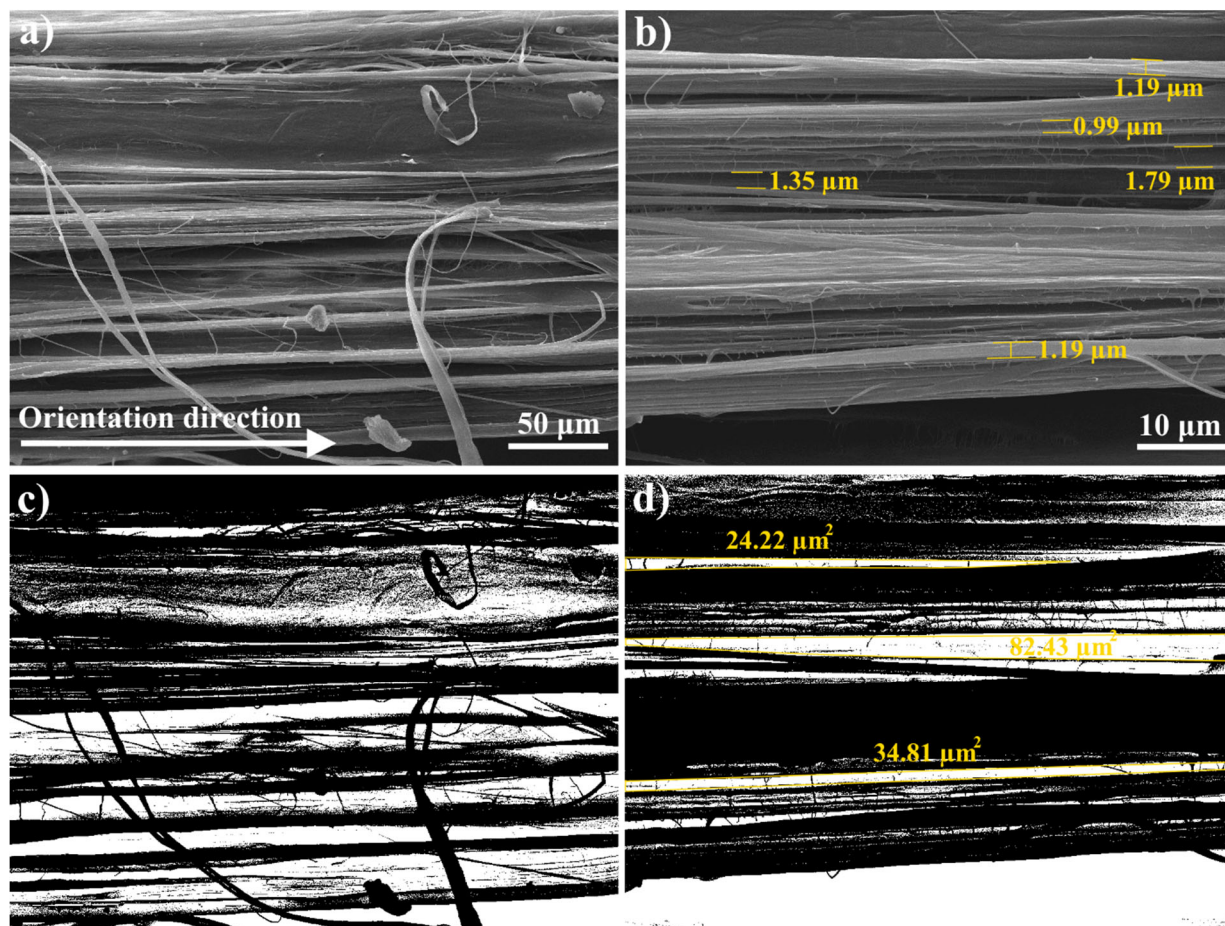

**Cavitation area in percentage =  $34 \pm 2$  %**

**Figure S11.** SEM micrographs of fibrillar structure for UHMWPE /1.0 wt. % PE-wax/ 2.0 wt. % GNP/PAN films obtained by second thermal orientation regime (a, b), (c, d) modified SEM images using the image J program. The average pore size is  $2.2 \pm 0.3$  μm.
